# Supplementary material
Source: PubMed Central journal article supplement (PMC6745051)

## Supplementary Online Content

Bjornevik K, Munger KL, Cortese M, et al. Serum neurofilament light chain levels in patients with presymptomatic multiple sclerosis. *JAMA Neurol*. Published online September 13, 2019. doi:10.1001/jamaneurol.2019.3238

**eFigure.** Flowchart of the Study

This supplementary material has been provided by the authors to give readers additional information about their work.

## Supplemental Figure 1: Flowchart of the Study

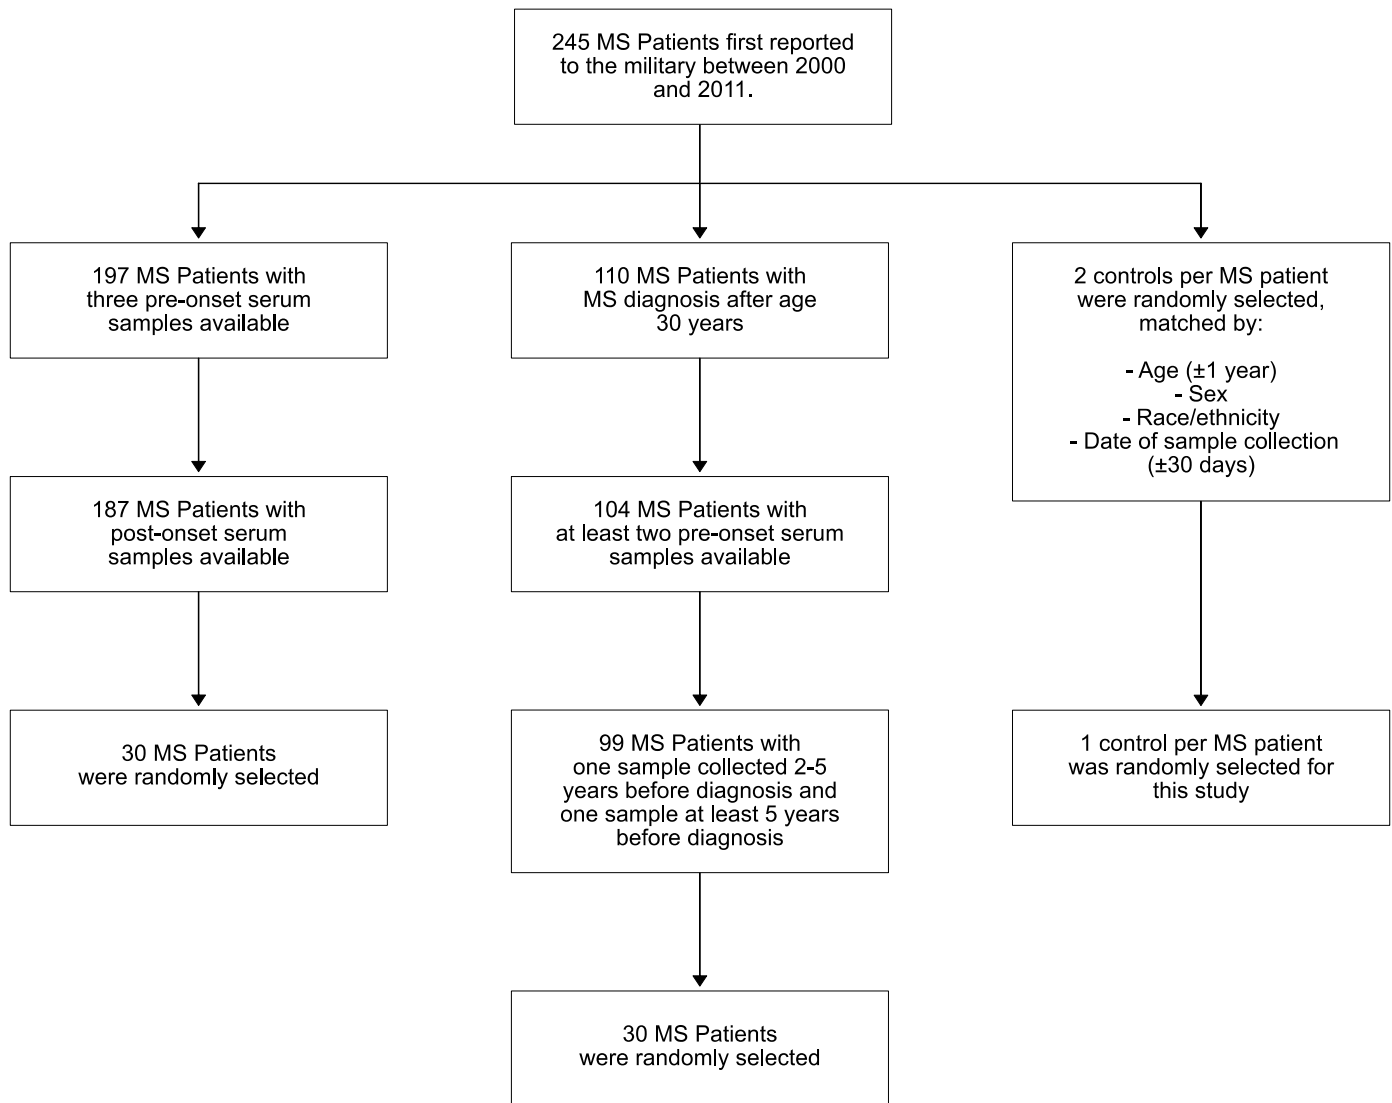

Supplement: jamaneurol-77-58-s001.pdf [file jamaneurol-77-58-s001.pdf]
